# Supplementary material for: DNA double-strand break–capturing nuclear envelope tubules drive DNA repair
Source: Springer Nature journal article supplement (doi:10.1038/s41594-024-01286-7), 2024-04-17
Supplement: 41594_2024_1286_MOESM1_ESM.pdf [file 41594_2024_1286_MOESM1_ESM.pdf]

# DNA double-strand break–capturing nuclear envelope tubules drive DNA repair

---

In the format provided by the  
authors and unedited

| <b>Table of Contents</b>                                              | <b>Page</b> |
|-----------------------------------------------------------------------|-------------|
| Supplementary Discussion                                              | 2-3         |
| Supplementary Table 1. TCGA cancer types studied.                     | 4           |
| Supplementary Table 2. Antibodies used in this study.                 | 5           |
| Supplementary Table 3. sgRNAs used in this study.                     | 5           |
| Supplementary Table 4. siRNAs and shRNA sequences used in this study. | 6           |
| Supplementary Table 5. FokI-DSB-related primers used in this study.   | 6           |
| Supplementary Table 6. RT-qPCR primers used in this study.            | 7           |
| Supplementary Table 7. Plasmids used in this study.                   | 7           |
| Supplementary References                                              | 8           |

## Supplementary Discussion

Our findings support a model where upon the induction of DNA damage, the DDR signaling kinases intersect with ATAT1-dependent microtubule acetylation (Fig. 6). The modified microtubules cooperate with the plus-end-directed kinesins KIF5B and KIF13B and nuclear envelope factors such as LINC and NPCs. This allows the cytoplasmic motors and microtubules to push onto the nuclear envelope, driving the formation of a network of nucleus-infiltrating tubular invaginations, or dsbNETs. The latter associate with DSBs away from or onto nuclear actin filaments, which partly promote dsbNETs-DSB association and partially stabilize the tubules. The perinuclear anchoring circadian factor PER1 also partly supports tubule formation. Overall, the dsbNETs are transient, and their reversal is mediated by the microtubule minus-end-directed kinesin-14 KIFC3. The dsbNETs can bring the nuclear envelope with its resident proteins to DSBs throughout the nucleus, promoting the sequestration of DSB ends within repair centers, optimizing repair protein engagement, and facilitating the reconnection of break ends to each other.

Our model is consistent with the ability of the human nuclear envelope to promote NHEJ repair<sup>22,23</sup> and resolve replication stress<sup>84</sup>. For instance, the transmembrane nuclease NUMEN, which specifically promotes NHEJ and limits HR, is enriched at the nuclear boundary and tubule-like lamin signals<sup>23</sup>. Also, evolutionarily conserved factors linked to the SUMOylation of proteins at the yeast nuclear envelope during repair via different pathways<sup>2,7,50,85,86</sup> are enriched at the nuclear envelope and localize to and promote the repair of DSBs throughout the human nucleus<sup>87-93</sup>. For example, yeast KU70 SUMOylation and function is regulated by the SUMO protease Ulp1, which is enriched at the Nup84 and Nup60 NPC factors<sup>86,87</sup>. An equivalent human SUMO protease, SENP2, localizes to the envelope via interaction with NUP153 and promotes NHEJ and HR repair<sup>24-26</sup>. The function of human XRCC4 downstream of KU70 during NHEJ repair is also linked to SUMOylation<sup>88,89</sup>. Also, the non-perinuclear-enriched RNF4, the human equivalent of the yeast DNA repair-promoting and NPC-associated Slx5/8 SUMO-targeted ubiquitin ligase, is recruited to DSBs and promotes NHEJ and HR throughout the nucleus<sup>90-93</sup>. Jointly, our and these studies show that the human nuclear envelope and its proteome mediate NHEJ and HR.

Various lines of evidence support the significance of dsbNETs to DSB repair and genome stability. Super-resolution three-dimensional imaging showed the preferred localization of DSBs at the nuclear envelope tubules as compared to the nuclear boundary (Fig. 1f,h; Fig. 3a,e) and live-cell imaging indicated the faster resolution of tubule-associated DSBs (Extended Data Fig. 2c). The disruption of dsbNETs increased the number and size of 53BP1 foci in three-dimensionally imaged nuclei and total intensity of 53BP1 and  $\gamma$ H2AX signals in dsbNETs-deficient cells (Fig. 1f,g; Fig. 2b,d-g,j; and Extended Data Figs. 2e, 4l, 5e-g, and 9j). Abrogating dsbNETs resulted in slower repair kinetics as assessed by both the relative rate of 53BP1 foci resolution and the detection of DSB ends using neutral comet assays (Extended Data Fig. 5d-g) and chromosomal DSB repair efficiency assays specifically assessing HR and NHEJ (Extended Data Fig. 8k,l). Imaging showed the increased splitting of DSB ends, that DSB ends tethering can be rescued in dsbNETs-deficient cells by enlarging the DNA repair centre (Fig. 4g-i; Extended Data Fig. 8f-h), and that knockdown of DSB ends-tethering factors NBS1 or RAD50 phenocopies the DSB ends splitting phenotype observed in dsbNETs-deficient cells (Fig. 4h; Extended Data Fig. 8c). We observed decreased localization of DNA repair factors to DSB ends in dsbNETs-deficient cells and the rescue of such localization upon enlarging the DNA repair center (Fig. 4g; Extended Data Fig. 8d-h). Microtubule acetylation and dsbNETs showed dependence on the DNA damage response kinases ATM, ATR, and DNAPKcs (Figs. 1i, 2h-j; Extended Data Fig. 4m) and dsbNETs were induced upon interfering with endogenous DSB repair via knockdown of the DSB ends-

tethering factors RAD50 or NBS1 (Extended Data Fig. 2k). BRCA1/HR-deficient cells more readily induced dsbNETs (Fig. 5e-g). Gene expression profiling showed the positive correlation of the dsbNETs-promoting KIF5B and the negative correlation of the dsbNETs-reversing KIFC3 with DNA repair gene expression, and HR and especially NHEJ signatures (Fig. 5a,c-d; Extended Data Fig. 9a-c). We also observed genetic interactions between *BRCA1* and genes encoding dsbNETs regulators, that dsbNETs promotion drives chromosomal defects in BRCA1-deficient cells treated with the PARPi olaparib, and that KIF5B knockdown confers resistance to olaparib (Fig. 5h-k; Extended Data Figs. 9i,j and 10a-e). Finally, expression of the premature aging-linked Progerin induces DSBs and dsbNETs while also exerting additive effects with etoposide treatment with respect to both DSB buildups and dsbNETs induction (Extended Data Fig. 10f).

In etoposide-treated cells, more than half of DSBs localized to dsbNETs throughout the nucleus and DSBs showed a bias toward association with the tubules compared to the nuclear boundary. In the context of the FokI-DSB, the possibility that the single DSB is preferentially located away from the nuclear edge due to lower induction of DSBs at perinuclear heterochromatin was ruled out by data indicating that de-compacting chromatin using the histone deacetylase inhibitor SAHA does not decrease, but in fact increases, the distance between the DSB and nuclear edge (Extended Data Fig. 6j). So, the data indicate that the FokI-DSB, similar to the drug-induced DSBs, is more likely to associate with the nuclear envelope at the tubules than at the nuclear edge.

We quantified dsbNETs via the tubular score from reconstructed nuclei, machine learning-based tubular scores from imaging stacks, percent tubules-positive cells, tubular width, and tubular bodies crossing the nuclear midplane. Damage-dependent induction of tubules-positive cells was ~2.8 fold in osteosarcoma cells and ~1.7 fold in TNBC cells, with full dependence on key regulators. Due to the tubules' interconnectedness in etoposide-treated cells, we could not determine the precise total number of individual tubules. Also, the DSBs and tubules were highly dynamic. So, we could not image or reconstruct the full network of dsbNETs in single nuclei in vivo as we did for single nuclei in fixed cells. Moreover, the tubules, especially with a single damaged locus, collectively occupy a volume that constitutes a small fraction of the total nuclear volume (Fig. 3a). So, it is experimentally unfeasible to catch a single damaged locus co-localizing with a tubule in all cells at the specific time point at which the samples were imaged.

Although dsbNETs depended on NUP153 and NUP50 but not NUP98, future research should assess the extent to which NPCs may still partly operate via nuclear-cytoplasmic trafficking to promote repair. Also, ~20-35% of unchallenged cells were tubules-positive across our study, though they did not significantly increase the tubular score (such as in Fig. 1b,c). This baseline of tubules-positive cells represents less extensive tubules unrelated to DNA damage and preferentially and constitutively connected with nucleoli. The potential function of this baseline is outside of the scope of our study. As outlined above, we have detected dsbNETs and assessed their impact on DNA repair via numerous approaches. DsbNETs efficiently formed in G<sub>1</sub> and S/G<sub>2</sub> cells, colocalized readily with 53BP1 foci, and at least to some extent with RAD51 foci, and the disruption of dsbNETs compromised NHEJ and HR repair of chromosomal DSBs. HR/BRCA1-deficient cells further induced dsbNETs and showed higher sensitivity to their disruption. Also, in PARPi-treated HR-deficient cells, KIF5B promoted chromosome fusions, a process operating via SUN1, SUN2, and microtubule-dependent NHEJ<sup>15,55</sup>. In addition, KIF5B knockdown increased the ability of *BRCA1*-mutant cells to resist olaparib. Future research may benefit from further assessing the potential role of dsbNETs in DNA repair pathway choice using different breaks and chromosomal contexts as repair progresses over time. Nonetheless, our findings indicate that dsbNETs can promote NHEJ and HR repair within diverse biological and health-related settings.

**Supplementary Table 1. TCGA cancer types studied.**

| Abbreviation | Name                                                             |
|--------------|------------------------------------------------------------------|
| BLCA         | Bladder Urothelial Carcinoma                                     |
| BRCA         | Breast invasive carcinoma                                        |
| CESC         | Cervical squamous cell carcinoma and endocervical adenocarcinoma |
| CLLE         | Chronic lymphocytic leukemia                                     |
| COAD         | Colon adenocarcinoma                                             |
| ESCA         | Esophageal carcinoma                                             |
| GBM          | Glioblastoma multiforme                                          |
| HNSC         | Head and Neck squamous cell carcinoma                            |
| KIRC         | Kidney renal clear cell carcinoma                                |
| LAML         | Acute Myeloid Leukemia                                           |
| LIHC         | Liver hepatocellular carcinoma                                   |
| LUAD         | Lung adenocarcinoma                                              |
| LUSC         | Lung squamous cell carcinoma                                     |
| MALY         | Malignant lymphoma                                               |
| NBL          | Neuroblastoma                                                    |
| OV           | Ovarian serous cystadenocarcinoma                                |
| PAAD         | Pancreatic adenocarcinoma                                        |
| PRAD         | Prostate adenocarcinoma                                          |
| RT           | Retinoblastoma                                                   |
| SKCM         | Skin Cutaneous Melanoma                                          |
| STAD         | Stomach adenocarcinoma                                           |
| TGCT         | Testicular Germ Cell Tumors                                      |
| THCA         | Thyroid carcinoma                                                |
| UCEC         | Uterine Corpus Endometrial Carcinoma                             |
| WT           | Wilm's tumor                                                     |

**Supplementary Table 2. Antibodies used in this study.**

| Antibodies                    | Concentration  | Company        | Catalogue #     | Application |
|-------------------------------|----------------|----------------|-----------------|-------------|
| KU70                          | 1 mg/ml        | Abcam          | Ab83501         | IF, WB      |
| RAD51                         | 1 mg/ml        | Abcam          | Ab133534        | IF          |
| BRCA1                         | 2 mg/ml        | Millipore      | OP92            | IF, WB      |
| $\gamma$ H2AX                 | 1 mg/ml        | Abcam          | Ab11174         | IF          |
|                               | 1 mg/ml        | Abcam          | Ab22551         | WB          |
| SUN1                          | 1 mg/ml        | ProteinTech    | 24568-I-AP      | IF, WB, IP  |
| SUN2                          | 1 mg/ml        | Millipore      | MABT880         | IF, WB      |
| SYNE1                         | 0.6 mg/ml      | Sigma Prestige | HPA019113-25UL  | IF          |
| NUP98                         | 1 mg/ml        | Invitrogen     | MA5-14907       | IF, WB      |
| NUP153                        | 0.2 mg/ml      | Bethyl         | A301-788A       | IF, WB      |
| LMNB1                         | 1 mg/ml        | Abcam          | Ab16048         | IF, WB, IP  |
|                               | 1 mg/ml        | ProteinTech    | 66095-1-Ig      | IF          |
| LMNA/C                        | 7 mg/ml        | Cell Signaling | 4777            | IF          |
| KIF5B                         | 1 mg/ml        | Abcam          | Ab167429        | IF, WB      |
| KIFC3                         | 0.1 mg/ml      | Thermo Fisher  | PA5-54359       | IF, WB      |
| $\beta$ -actin                | Not provided   | Thermo Fisher  | AM4302, MA1-744 | IF, WB      |
| NUP98                         | 1 mg/ml        | Invitrogen     | MA5-14907       | IF, WB      |
| NUP153                        | 0.2 mg/ml      | Bethyl         | A301-788A       | IF, WB      |
| 53BP1                         | 1 mg/ml        | Abcam          | Ab36823         | IF, WB      |
|                               | 1 mg/ml        | Bethyl         | A300-272A       | IF, WB      |
|                               | 1 mg/ml        | Millipore      | MAB3802         | IF          |
| RNF8                          | Not provided   | Santa Cruz     | Sc-271462       | IF, WB      |
| RAD50                         | Not provided   | Novus          | NB100-1487      | IF, WB      |
| NBS1                          | 2 mg/ml        | Bethyl         | A301-290A       | IF, WB      |
| Acetylated $\alpha$ -tubulin  | 317 $\mu$ g/ml | Cell Signaling | 5335S           | IF          |
| DNAPK-p2056                   | 0.448 mg/ml    | Abcam          | ab124918        | WB          |
| phospho-Chk1 S345             | 141 $\mu$ g/ml | Cell Signaling | 2341S           | WB          |
| phospho-Chk2 T68              | 0.2 mg/ml      | R&D Systems    | AF1626          | WB          |
| Vinculin                      | Not provided   | Millipore      | V9131           | WB          |
| Phosphoserine                 | Not provided   | Millipore      | AB1603          | WB          |
| Ubiquitin                     | 200 $\mu$ g/ml | Santa Cruz     | Sc-8017         | WB          |
| Alexa-488 anti-mouse          | 2 mg/ml        | Invitrogen     | A11001          | IF          |
| Alexa-488 anti-rabbit         | 2 mg/ml        | Invitrogen     | A11008          | IF          |
| Alexa-568 anti-mouse          | 2 mg/ml        | Invitrogen     | A11004          | IF          |
| Alexa-568 anti-rabbit         | 2 mg/ml        | Invitrogen     | A11011          | IF          |
| Alexa-647 anti-mouse          | 2 mg/ml        | Invitrogen     | A21235          | IF          |
| Phalloidin-iFluor reagent 488 | Not provided   | Abcam          | 76753           | IF          |
| anti-rabbit IgG               | 1 mg/ml        | Abcam          | Ab171870        | IP          |
| HRP-mouse-IgG                 | Not provided   | Amersham       | NA931-1ML       | WB          |
| HRP-rabbit-IgG                | Not provided   | Amersham       | NA934-1ML       | WB          |
| $\alpha$ -Tubulin             | 1 mg/ml        | Abcam          | ab7291          | WB          |
| XRCC4                         | 0.2 mg/ml      | Santa Cruz     | sc-271087       | WB, ChIP    |

**Supplementary Table 3. sgRNAs used in this study.**

| sgRNAs                | Sequence (5' $\rightarrow$ 3') |
|-----------------------|--------------------------------|
| sgRNA1                | AUGGACGAGCUGUACAAGUC           |
| sgRNA2                | CAAGAUCCGCCACAACAUCG           |
| sgRNA3                | GUCGCCCUCGAACUUCACCU           |
| Non-targeting control | AAAUGUGAGAUCAGAGUAAU           |

**Supplementary Table 4. siRNA and shRNA sequences used in this study**

| Target           | Type  | Sense Sequence (5' → 3')                                                                                                                                                                         | Anti-sense Sequence (5' → 3') |
|------------------|-------|--------------------------------------------------------------------------------------------------------------------------------------------------------------------------------------------------|-------------------------------|
| SUN1             | siRNA | GUGUUGAACUGGGCAAGCAtt                                                                                                                                                                            | UGCUUGCCCAGUUCAACACgg         |
| SUN2             | siRNA | CGUAUGGUGCUUGGUUUUtt                                                                                                                                                                             | AAAUACCAAGCACCAUACGtc         |
| KIFC3            | siRNA | CCAAUGCUGUGACUUUCGAtt                                                                                                                                                                            | UCGAAAGUCACAGCAUUGGtg         |
| KIF5B            | siRNA | CCAAUGCUGUGACUUUCGAtt                                                                                                                                                                            | AUAACUCCAAUUGCGGUUct          |
| NUP98            | siRNA | GGAUUGUUUGGAACCAGUUtt                                                                                                                                                                            | AAGUGGUUCCAAAACAAUCCtc        |
| NUP153           | siRNA | CUUUUUUUUCUGGCCAGCGtg                                                                                                                                                                            | CUUUUUUUUCUGGCCAGCGtg         |
| RNF8             | siRNA | GAGGAUUUGGUGUCACAUAtt                                                                                                                                                                            | UAUGUGACACCAAAUCCUCgt         |
| RAD50            | siRNA | GGCCUUUAAGUGAAGGAAAtt                                                                                                                                                                            | UUUCCUUCACUUAAAGGCCaa         |
| NBS1 (NBN)       | siRNA | GGAAAAACUGUGCCAUUCUtt                                                                                                                                                                            | AGAAUGGCACAGUUUUUCtt          |
| BRCA1            | siRNA | CAACAUGCCCACAGAUCAA<br>CCAAAGCGAGCAAGAGAAU<br>UGAUAAAGCUCCAGCAGGA<br>GAAGGAGCUUCAUCAUUC                                                                                                          | Not applicable                |
| ATAT1 (C6orf134) | siRNA | GGCUCAUAAUGAGGUAGAAAtt                                                                                                                                                                           | UUCUACCUCAUUAUGAGCCtc         |
| KIF13B           | siRNA | GGAUGAUGCUGACCGUGAAAtt                                                                                                                                                                           | UUCACGGUCAGCAUCAUCCtc         |
| PER1             | siRNA | AGCGCGUCAUGAUGACCUAtt                                                                                                                                                                            | UAGGUCAUCAUGACGCGCUgg         |
| NUP50            | siRNA | GAAGGACUGUCGAAUGGAAAtt                                                                                                                                                                           | UUCCAUUCGACAGUCCUUCca         |
| CTL              | siRNA | Silencer™ Select Negative Control No. 1<br>siRNA (Cat# 4390843, Ambion) /<br><br>For BRCA1 experiment:<br>UGGUUUACAUGUCGACUAA<br>UGGUUUACAUGUUGUGUGA<br>UGGUUUACAUGUUUCUGA<br>UGGUUUACAUGUUUCCUA | Not applicable                |
| KIFC3 (shRNA)    | shRNA | TGAAGGCTGTGCACGAGAATC                                                                                                                                                                            | GATTCTCGTGCACAGCCTCA          |
| KIF5B (shRNA)    | shRNA | CAACCGCAATTGGAGTTATAG                                                                                                                                                                            | CTATAACTCCAATTGCGGTTG         |

**Supplementary Table 5. FokI-DSB-related primers used in this study.**

| Primer | Forward (5' → 3')       | Reverse (5' → 3')      |
|--------|-------------------------|------------------------|
| 1      | GCTGGTGTGGCCAATGC       | TGGCAGAGGGAAAAAGATCTCA |
| 2      | GGCATTTCAGTCAGTTGCTCAA  | TTGGCCGATTCATTAATGCA   |
| 3      | CCACCTGACGTCTAAGAAACCAT | GATCCCTCGAGGACGAAAGG   |

**Supplementary Table 6. RT-qPCR primers used in this study.**

| Primer       | Sequence (5'→3')       |
|--------------|------------------------|
| ATAT1 FWD    | CAATAACCTTAAGGGAGGAG   |
| ATAT1 RVS    | GATAGGAGCGGAAAGATTCT   |
| KIF13B FWD   | CTGACTTGCATACCAAATGT   |
| KIF13B RVS   | ATCATAAGCAAACACCTCG    |
| PER1 FWD     | ACTCAGAAAGGAACCTCATGAC |
| PER1 RVS     | TGCTGGTAGTATTCTGGTT    |
| Vinculin FWD | CAACTCACCTCTTGGGATGAAG |
| Vinculin RVS | CCTGGTTCAGTTGGAGTCTATG |

**Supplementary Table 7. Plasmids used in this study.**

| Plasmid                        | Source                         |
|--------------------------------|--------------------------------|
| GFP-Lamin B1                   | Kind gift from J. Lammerding   |
| EB1-tdTomato                   | Addgene cat# 50825             |
| RFP-LMNB1                      | Kind gift from J. Lammerding   |
| GFP-53BP1                      | Kind gift from D. Durocher     |
| KIF5B-YFP                      | Kind gift from S. Linder/C. Gu |
| KIF5B-T92N-YFP                 | Kind gift from S. Linder/C. Gu |
| dCas9-GFP                      | This study                     |
| KU70-GFP                       | This study                     |
| KU70-GFP-SUN1ΔN                | This study                     |
| GFP-SUN1                       | This study                     |
| GFP-SUN1ΔN                     | This study                     |
| NLS-Actin                      | Addgene cat# 118380            |
| NLS-Actin-R62D                 | Addgene cat# 118381            |
| Lamin A minigene               | Addgene cat# 20291             |
| G606G:GGC>GGT Lamin A minigene | Addgene cat# 20292             |
| Tet-pLKO-puro                  | Addgene cat# 21915             |
| pLKO.1 Puro shRNA scramble     | Addgene cat# 162011            |
| psPAX-2                        | Addgene cat# 12260             |
| pMD2.G                         | Addgene cat# 12259             |
| pCBASceI                       | Addgene cat# 26477             |
| pcDNA3-mRFP                    | Addgene cat# 13032             |



### Supplementary References

84. Lamm, N. et al. Nuclear F-actin counteracts nuclear deformation and promotes fork repair during replication stress. *Nat. Cell Biol.* **22**, 1460-1470 (2020).
85. Therizols, P. et al. Telomere tethering at the nuclear periphery is essential for efficient DNA double strand break repair in subtelomeric region. *J Cell Biol* **172**, 189-99 (2006).
86. Palancade, B. et al. Nucleoporins prevent DNA damage accumulation by modulating Ulp1-dependent sumoylation processes. *Mol Biol Cell* **18**, 2912-23 (2007).
87. Hang, L.E. et al. Regulation of Ku-DNA association by Yku70 C-terminal tail and SUMO modification. *J Biol Chem* **289**, 10308-10317 (2014).
88. Cabello-Lobato, M.J. et al. Microarray screening reveals two non-conventional SUMO-binding modules linked to DNA repair by non-homologous end-joining. *Nucleic Acids Res* **50**, 4732-4754 (2022).
89. Yurchenko, V., Xue, Z. & Sadofsky, M.J. SUMO modification of human XRCC4 regulates its localization and function in DNA double-strand break repair. *Mol Cell Biol* **26**, 1786-94 (2006).
90. Galanty, Y., Belotserkovskaya, R., Coates, J. & Jackson, S.P. RNF4, a SUMO-targeted ubiquitin E3 ligase, promotes DNA double-strand break repair. *Genes Dev* **26**, 1179-95 (2012).
91. Galanty, Y. et al. Mammalian SUMO E3-ligases PIAS1 and PIAS4 promote responses to DNA double-strand breaks. *Nature* **462**, 935-9 (2009).
92. Li, Y.J., Stark, J.M., Chen, D.J., Ann, D.K. & Chen, Y. Role of SUMO:SIM-mediated protein-protein interaction in non-homologous end joining. *Oncogene* **29**, 3509-18 (2010).
93. Yin, Y. et al. SUMO-targeted ubiquitin E3 ligase RNF4 is required for the response of human cells to DNA damage. *Genes Dev* **26**, 1196-208 (2012).
