# Supplementary material for: DNA double-strand break–capturing nuclear envelope tubules drive DNA repair
Source: Springer Nature journal article supplement (doi:10.1038/s41594-024-01286-7), 2024-04-17

Source Data Blots  
Related to Fig. 2

Fig. 2i

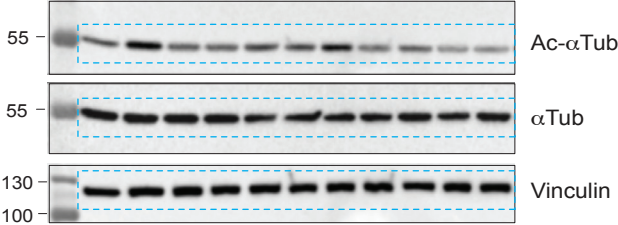

Supplement: 41594_2024_1286_MOESM22_ESM.pdf [file 41594_2024_1286_MOESM22_ESM.pdf]
