# Supplementary material for: DNA double-strand break–capturing nuclear envelope tubules drive DNA repair
Source: Springer Nature journal article supplement (doi:10.1038/s41594-024-01286-7), 2024-04-17

**Source Data Blots  
Related to Extended Data Fig. 2**

Extended Data Fig. 2b

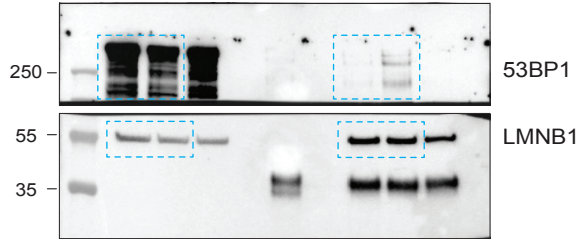

Extended Data Fig. 2h

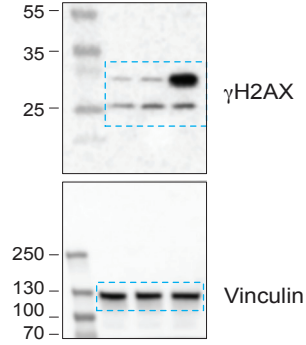

Extended Data Fig. 2i

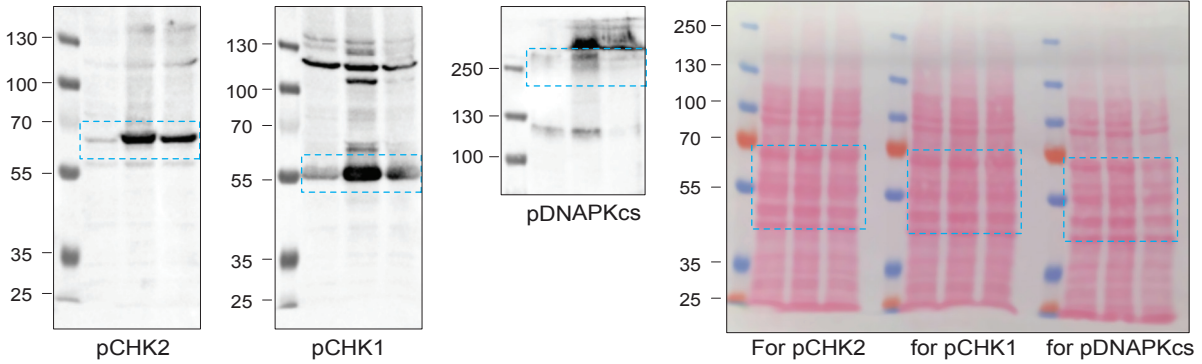

Extended Data Fig. 2l      Extended Data Fig. 2m

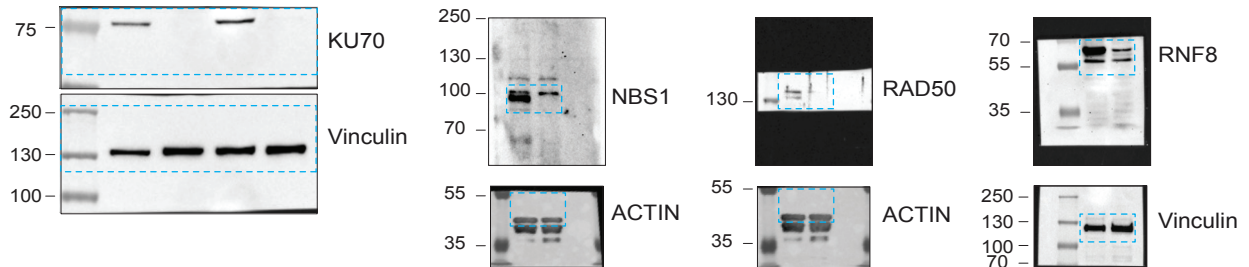

Supplement: 41594_2024_1286_MOESM23_ESM.pdf [file 41594_2024_1286_MOESM23_ESM.pdf]
