# Supplementary material for: DNA double-strand break–capturing nuclear envelope tubules drive DNA repair
Source: Springer Nature journal article supplement (doi:10.1038/s41594-024-01286-7), 2024-04-17

## Source Data Blots Related to Extended Data Fig. 7

Extended Data Fig. 7b

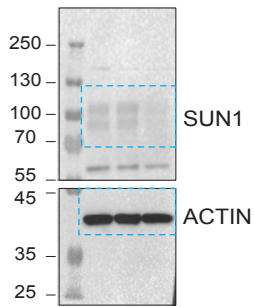

Extended Data Fig. 7c

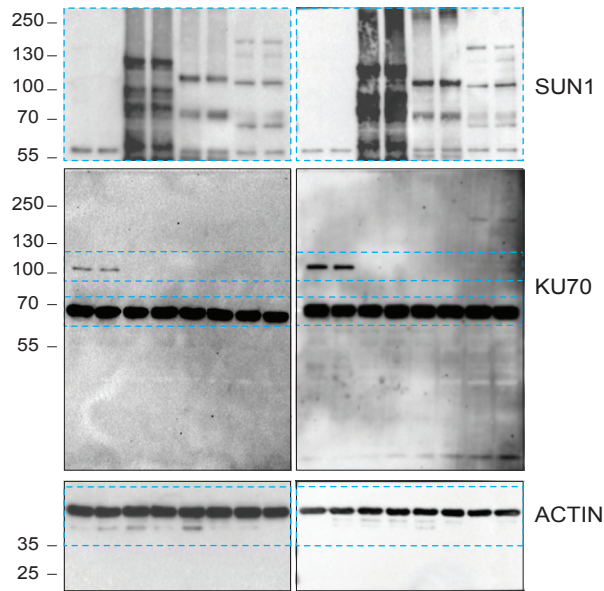

Extended Data Fig. 7e

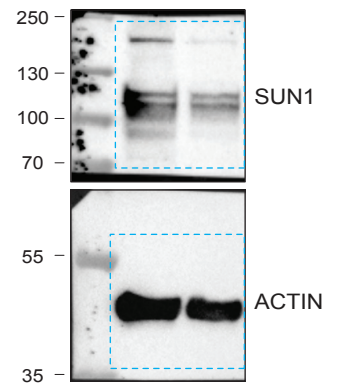

Extended Data Fig. 7f

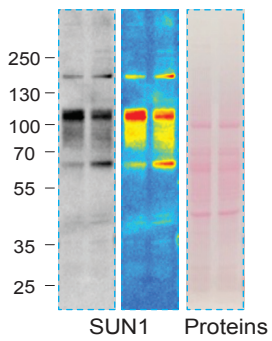

Extended Data Fig. 7g

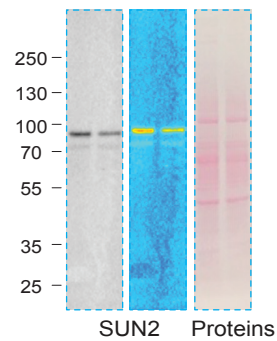

Extended Data Fig. 7h,i

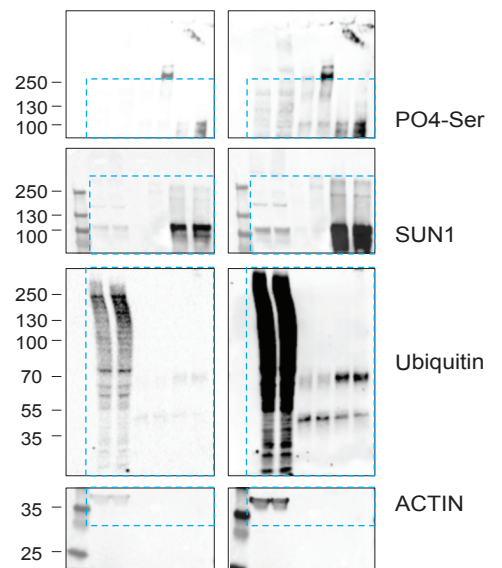

Supplement: 41594_2024_1286_MOESM27_ESM.pdf [file 41594_2024_1286_MOESM27_ESM.pdf]
