# Supplementary material for: DNA double-strand break–capturing nuclear envelope tubules drive DNA repair
Source: Springer Nature journal article supplement (doi:10.1038/s41594-024-01286-7), 2024-04-17

**Source Data Blots**  
**Related to Extended Data Fig. 8**

Extended Data Fig. 8b

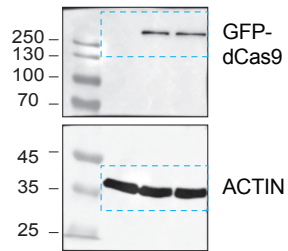

Extended Data Fig. 8e

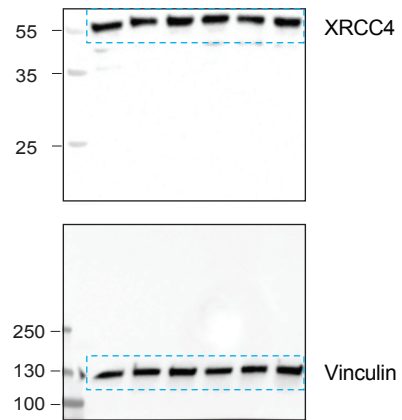

Supplement: 41594_2024_1286_MOESM28_ESM.pdf [file 41594_2024_1286_MOESM28_ESM.pdf]
